# Supplementary material for: Molecular Insights into the Transmembrane Domain of the Thyrotropin Receptor
Source: PubMed Central journal article supplement (PMC4636318; doi:10.1371/journal.pone.0142250), 2015-11-06
Supplement: pone.0142250.s002.pdf [file pone.0142250.s002.pdf]

## S2 Align. Sequence alignment of the LGR receptors.

```

FSHR_HUMAN      : D L C I G I Y L L L I A S V D I H T K S Q Y N H Y A I D W Q T G A G C ----- Y V M S L L V - L N V L A F V V I C G C Y
LSHR_HUMAN      : D F C M G I Y L L L I A S V D S Q T K G Q Y N H A I D W Q T G S G C ----- Y I L T I L I - L N V V A F F I I C A C Y
TSHR_HUMAN      : D F C M G M Y L L L I A S V D L Y T H S E Y N H A I D W Q T G P G C ----- Y I V F V L T - L N I V A F V I V C C C Y
LGR4_HUMAN      : N L F M G I Y T G I L T F L D A V S W G R F A E F G I W W E T G S G C ----- F T V T L V L - L N S L A F L L M A V I Y
LGR5_HUMAN      : N M L T G V S S A V L A G V D A F T F G S F A R H G A W W E N G V G C ----- Y M V A L I L - L N S L C F L I M M T I A Y
LGR6_HUMAN      : N T L T G I S C G L L A S V D A L T F G Q F S E Y G A R W E T G L G C ----- F T V A L V M - M N S F C F L V V A G A Y
B3DGM7_DANRE    : D L C I G I Y L L M I A T V D L R T R G H Y S H H A I E W Q T G A G C ----- Y V I L L L L - F N V G A F L V I C G C Y
Q7ZC0_DANRE     : D L C M G I Y L L L I A A V D I H T Q S R Y Y N Y G I D W Q T G A G C ----- Y V V L L L L - L N A A A F L V V C V C Y
C0SKM5_DANRE    : D L C M G I Y L L L I A S V D L H T Q S E Y N H A I D W Q T G P G C ----- Y I I C V L V - L N I L A F I V I C V C Y
Q86BL1_DROME    : D F F M G I Y L G I L A I V D A A T L G E F R M F A I P W Q M S V L C ----- Y V I S L M F - I N G C A F L T L M G C Y
Q8SX01_DROME    : D L C L G L Y L L L I V A C F D A H S M G E Y F N F A Y D W Q Y G L G C ----- Y L I A I L G - S N G V A F S I I A V C Y
C3Y0H9_BRAFL    : D F C L G F Y L L M L A A A D I Y S S H S Y T W A I V W Q T G G G C ----- Y V A T T M I - I S V L A F G L I C G C Y
Q18759_CAEEL    : D M V T G I Y L A V L A I A D A K M S D E Y R H A V W W Q T G W G C ----- Y L I F G L S - F N F L A F A A M A L S Y
F6YU08_CIOIN    : D I L M G L F L L I I C I K G V H F S G S Y C Y H D I A W R S S T T C ----- Y S T F I V T - F N F I L F M F I F V S Y
F7BKP7_CIOIN    : D F L M G V Y L A V V A G Y S V S F S G K Y C F E D E G W R T G T T C ----- F A I V I V S - V N F L L F L F I A G S Y
F7ABQ9_CIOIN    : D L L M G V Y L L S I G I K G S L Y S G I Y C Y H D I E W R S S P L C ----- Y S M A I I T - I N F V L F L Y M L V G Y
H2XKW4_CIOIN    : D F L M G I Y L I T I S I K G V H F S G S Y C Y N D L E W R T S K L C ----- Y S L F L I S - L N F T M F M Y I L V S Y
F7AT69_CIOIN    : D L L M G V F L I A L G I R S A S T S G N Y C L I D H S W R S G T P C ----- F S L T V T I - T N F I L C L Y I V G A Y
H2XRM0_CIOIN    : D L L M G I Y L L M I A V V D S V H Q V E F F A F S H I W R H S G F C ----- F S L F V I I - F N L V A F F A M V T S Y
H2Y0P5_CIOIN    : D F L M S V Y L L A V S I K G L Q F S S R Y C Y H D Q E W R S S Q L C ----- Y S T F L I T - L N F A L F I Y M V F S Y
H2Y257_CIOIN    : D L L M G V Y L L S I S I Q G A I F S G R Y C Y H D M E W R S G T L C ----- Y S T S I I I - M N F V L F I Y I M V S Y
F6PUY5_CIOIN    : G F L M G I Y L I A I A I K A A E F S K L Y C Y F D T D W R T S D T C ----- Y T T F L I T - L N T C L F I Y I V A C Y
H2XND0_CIOIN    : D L L I G V Y L I L L G G T G A F Y S G T Y C A N K L T W L S S S L C ----- F T F L L L S - L N L A A F I F V A A S Y
F7B2P5_CIOIN    : D L I M G V Y L I V L G S M G I K Y G G K F C A H A K H W M G S G T C ----- Y P I V T A A - F N F T A F V F V A S S Y
F6XS16_CIOIN    : D G L M G V Y L I I I A I M S V Q F S G K Y C Y M D K I W R S G Q L C ----- F T V T V I T - F N F A A F I M M V L F Y
H2XKG9_CIOIN    : D G L M G I Y L I I L G A K G L Q F S G N Y C R F D K S W R T S S Q C ----- Y S V I I I L - F N F F M F V Y I C V A Y
H2XK45_CIOIN    : D F F M G I Y L F T L T A M D S R S S G N Y Y K F G V E W Q T G G G C ----- Y V A V L L S - L D I C A F M V V V G S Y
A7RGG2_NEMVE    : D F C L G L Y L F I L T C V S M D T H G I Y H N Y V R R W Q Y G A G C ----- Y V A F L L F - L N G A A F A F V L Y L Y
A7RR17_NEMVE    : N F F M G I Y L G M I A T A D A C T Y G E Y Q N H A R A W Q F G T G C ----- Y V T F L L I - T N G I A F L S V L F C Y
A7RZD5_NEMVE    : D M C M G L Y L G L L A I V D A S T I G D F L H H G V E W Q L S T G C ----- F V T F T M V - L N C A A F L V I F G C Y
RXFP1_HUMAN     : D C L M G I Y L F V I G G F D L K F R G E Y N K H A Q L W M E S T H C ----- Y S V A I F L G I N L A A F I I I V F S Y
RXFP2_HUMAN     : D C L M G V Y L F F V G I F D I K Y R G Q Y Q K Y A L L W M E S V Q C ----- Y S L G I F L G V N L L A F L I I V F S Y
B0S5B5_DANRE    : D C L M G V Y L L F I G A F D I K Y C G E Y N R H A Q I W M E S L S C ----- Y S T A I F L G L N L L A F V M I V F S Y
E6Y2S4_DANRE    : D C L M G V Y L F F V G I F D V K F R G E Y N K N A K V W M E S L E C ----- Y S T G I F L G L N L L A F L I I V V S Y
E6Y2S3_DANRE    : D C L M G V Y L F F L G I F D V K F R G E Y N R N A L I W M D S V E C ----- Y S T G I F L G L N L V A F L V I V I S Y
D9IDV5_DANRE    : D G L M G V Y L F M I G A Y D L K F R G E Y N R H A Q A G M D S E A C ----- Y S I V I F L G L N L V A F L I I V L S Y
Q0IGY0_DROME    : D F L M G I Y L T L I A C A D I S F R G E Y I K Y E E T W R H S G V C ----- Y S A L L F I L V N T L S L I F I L F S Y
Q86P34_DROME    : D M L M G F Y L V T I G V Q D Y R Y R N E Y Y K V V L D W I T S W Q C ----- Y S A F V F L G V N L L L L V M I A M L Y
C3YZP4_BRAFL    : D L V M G V Y L I I I G T K D V V R G I Y N R H A L E W K E S F G C ----- Y S A F I F L G V N F T S L L I I L S A Y
C3XWG5_BRAFL    : D L I M G V Y L L I I G T K D V M L R G V Y N Q H A E E W K T G Y G C ----- Y S A F V F I G I N F S S L L V I M A A Y
C3XWG4_BRAFL    : D F I M G V Y L L V I A T K D M T F R G V Y H R H T H A W T N S L G C ----- Y S A F I F L G V N F V S V L V I G A A Y
C3YZP5_BRAFL    : D L I M G I Y L L I I G S K D H V Y R D V Y N Q Y A Q E W K Q S Y S C ----- Y S A F I F L G I N F T S L T V I L F A Y
C3YE30_BRAFL    : D A I M G V Y C I I I A S A D E H Y R G R Y I E N A E A W K Q G G L C ----- Y S A F L F I I F N F C A S V M L I V Y Y
H2XR57_CIOIN    : D F L M G V A L L I I A I K S A Q F S G Q Y C W R D L L W R S S T T C ----- E I S A V I M S F N F I T L L Y I S A A Y
F7BL24_CIOIN    : D F L M G V Y L I C I A I Y S A V F S G R Y C Y E D E K W R T G S S C ----- R I S I T I V S I N F F V F V F I A L A Y
A7RSL9_NEMVE    : D F M M G L Y L L I I A F K D V Q W Q G E Y F K H D L S W R V S G L C ----- Y S V S F F I G L N F I A F M F I L L A Y
A7RSM8_NEMVE    : D F L M G V Y M L L I A I K D V E Y Q G E Y F K H D I E W R S G R L C ----- Y S V A I F V V L N F V S F V F I L V A Y
A7RZ84_NEMVE    : D L L M G V Y L W I I A I Q G V R W T G E Y F R Y D V Q W R T G M L C ----- Y S F A I F I V F N S A A F L F I L V A Y
A7S953_NEMVE    : D W L M G C Y L I I I A I K D L E W R G E Y F K H D V A W R S S R L C ----- Y S V T L F I G L N A V A F S F I L I A Y
A7SPG8_NEMVE    : D L L M G V Y L M I I A I T D A K W Q G E Y F K H D V T W R A G I G C ----- Y S V A F F I G L N S I A F I F I L V A Y
A7SSB7_NEMVE    : D L L M G V Y L L L I A I M D T K W Q G E Y F K H D I E W R S G I G C ----- Y A V V I F I G V N L V A F M F M L F A Y
A7SU96_NEMVE    : D F M M G V Y M V V I G S V D K Y Y R G K Y F I Y N E E W K R S H L C ----- Y S V F V F L V L N F I S F M A I F I L Y

```

Sequence alignment of residues 2.50 to 3.25 and residues 5.38 to 5.58 of the 52 LGR receptors from *H. sapiens*, *D. rerio*, *C. intestinalis*, *B. Floridae*, *D. melanogaster*, *C. elegans* and *N. vectensis*. Fully conserved positions are shaded in black, partially conserved or type-conserved positions are shaded in dark grey (80% conservation) or light grey (60% conservation). The sequence names correspond to the Uniprot identifiers (entry names).
